# Supplementary material
Source: Elsevier journal article supplement (https://www.sciencedirect.com/science/article/pii/S0213911120302119)
Supplement: mmc1 [file S0213911120302119:mmc1.doc]

**Appendix**

**Figure I.** Sandstorm photographed NASA’s satellites (22-23/02/2020).


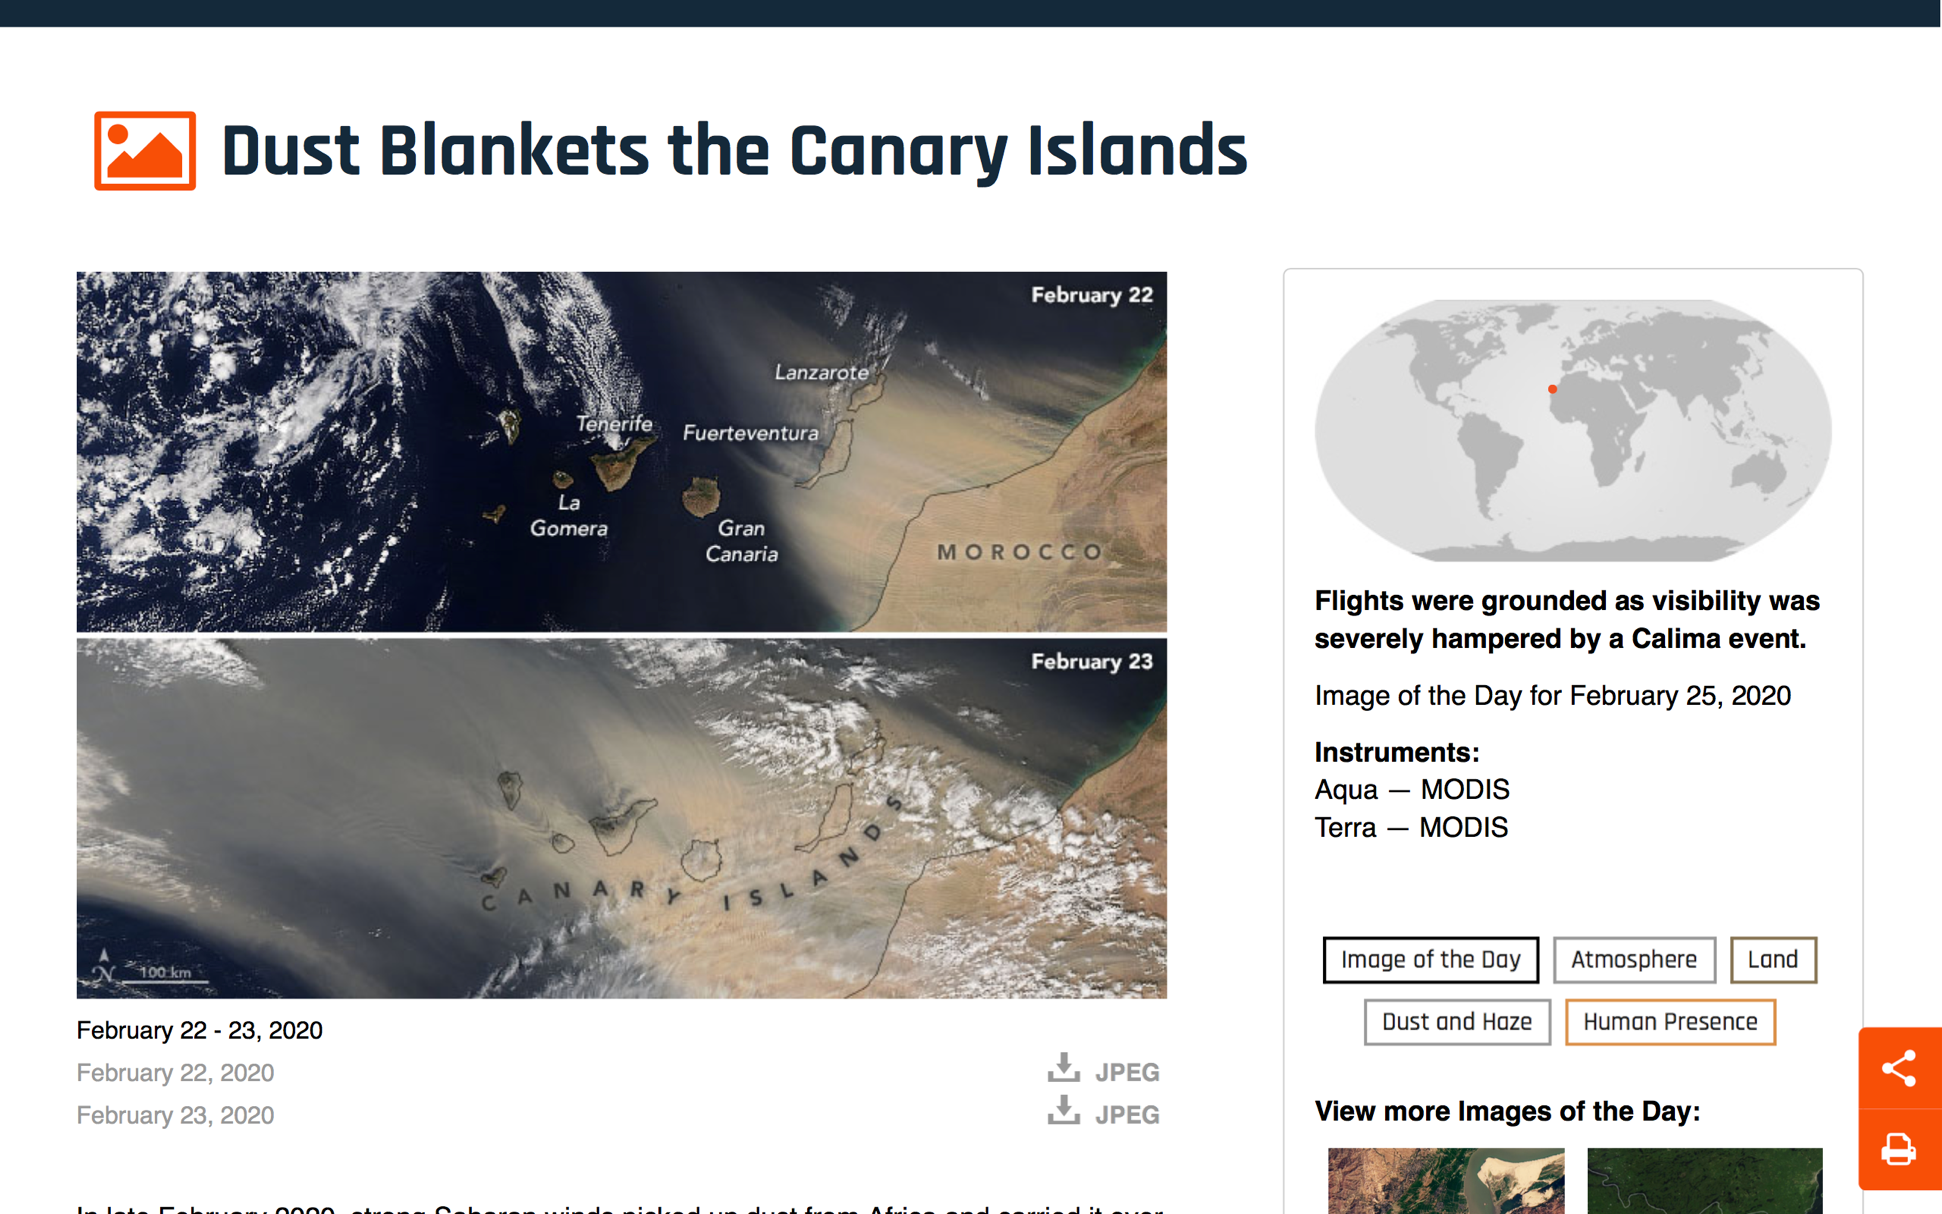


NASA Earth Observatory images by Joshua Stevens, using MODIS data from NASA EOSDIS/LANCE and GIBS/Worldview. Available at: https://earthobservatory.nasa.gov/images/146337/dust-blankets-the-canary-islands. Accessed May 13, 2020.

**Table I**

Celebrations in Santa Cruz de Tenerife and Las Palmas de Gran Canaria.

| **February 2020** | **Santa Cruz de Tenerife** | **Las Palmas de Gran Canaria** |
| --- | --- | --- |
| Friday 21 | Starting *Cabalgata*  Carnival night | *Gala de la Reina*  Carnival night |
| Saturday 22 | From 00:00 a.m. carnival celebrations were cancelled | From 00:00 a.m. carnival celebrations were cancelled |
| Sunday 23 | Concerts at 11:00 a.m.  (Avenida Francisco La Roche) and at 01:00 p.m. (Candelaria square) | Carnival celebrations were cancelled for all day |
| *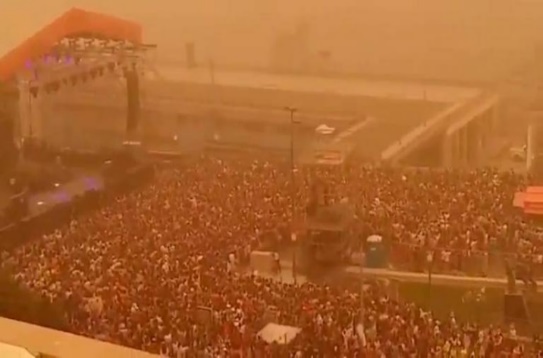Carnaval de Día* (daytime carnival), people concentration peak between 01:00 and 02:00 p.m. in Santa Cruz de Tenerife. According to the authorities, 55,800 vehicles entered the city, of which 28,000 by the northern motorway TF-5 | | |
| Monday 24 | Celebrations for kids were cancelled  Celebrations were allowed from the night | Morning celebrations were cancelled  Celebrations were allowed from 11:00 p.m. |
| Tuesday 25 | Night celebrations on Monday night are among the greatest events in Santa Cruz de Tenerife  Tuesday of Carnival | Tuesday of Carnival |
| Saturday 29 | Big final concert (by Carlos Vives) | *Gran Cabalgata* and Carnival Night |
|  | Waste produced 90,272 kg | Waste produced18,100 kg (3,900 less than previous year) |
| 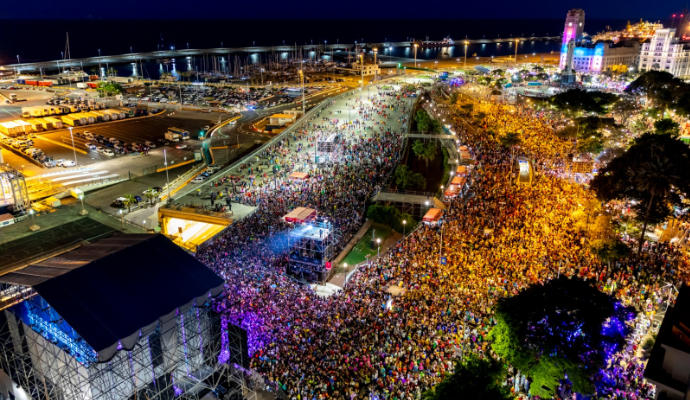Photo of the Concert by Carlos Vives and Tony Tun. According to municipal estimates, participants were around 450,000 | | |
